# Supplementary material
Source: Springer Nature journal article supplement (https://www.springermedizin.de/resource/supplementary/12885_2009_2155_MOESM8_ESM.pdf/9460644)

1 2 3 4 5 6 MW (kDa)

97.4

66.2

43.0

31.0

20.1

14.4

### Band up

Annexin A2, isoform 2  
Glyceraldehyde-3-phosphate dehydrogenase  
hnRNP A2  
Mutant beta-actin

### Band down

hnRNP A2  
Unname protein product  
Transformation upregulated nuclear protein

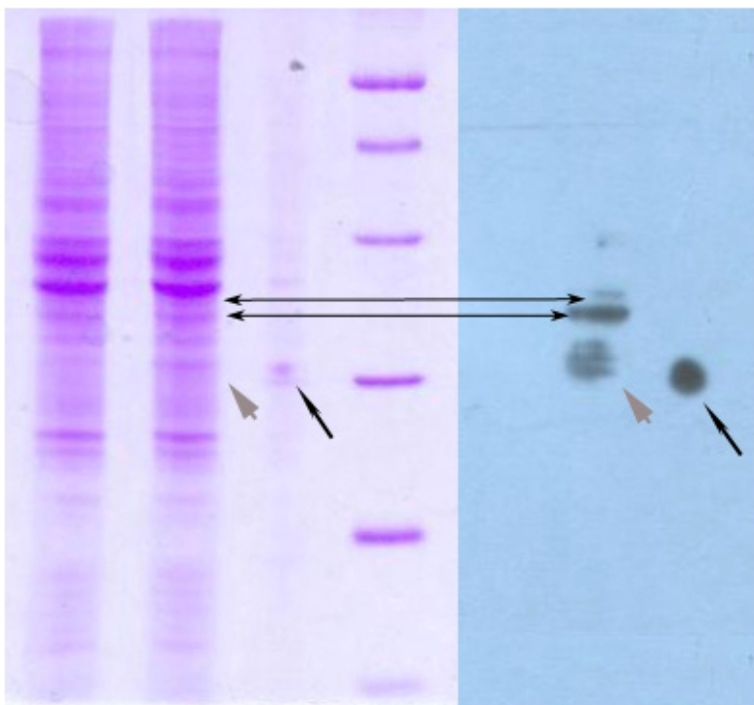

Supplement: MOESM8 [file 9460644]
